# Supplementary material for: Nucleobases and corresponding nucleosides display potent antiviral activities against dengue virus possibly through viral lethal mutagenesis
Source: PubMed Central journal article supplement (PMC5929572; doi:10.1371/journal.pntd.0006421), 2018-04-19
Supplement: pntd.0006421.s001.pdf [file pntd.0006421.s001.pdf]

**S1 Table. Inactive molecules**

| Entry      | Structure                                                                           | Entry      | Structure                                                                           | Entry      | Structure                                                                          |
|------------|-------------------------------------------------------------------------------------|------------|-------------------------------------------------------------------------------------|------------|------------------------------------------------------------------------------------|
| <b>7a</b>  | 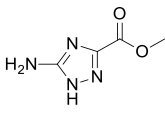   | <b>16a</b> |    | <b>25a</b> |  |
| <b>8a</b>  |    | <b>17a</b> |    |            |                                                                                    |
| <b>9a</b>  |    | <b>18a</b> |    |            |                                                                                    |
| <b>10a</b> |    | <b>19a</b> |    |            |                                                                                    |
| <b>11a</b> |   | <b>20a</b> |   |            |                                                                                    |
| <b>12a</b> |  | <b>21a</b> |  |            |                                                                                    |
| <b>13a</b> |  | <b>22a</b> |  |            |                                                                                    |
| <b>14a</b> |  | <b>23a</b> |  |            |                                                                                    |
| <b>15a</b> |  | <b>24a</b> |  |            |                                                                                    |
