# Supplementary material for: Nucleobases and corresponding nucleosides display potent antiviral activities against dengue virus possibly through viral lethal mutagenesis
Source: PubMed Central journal article supplement (PMC5929572; doi:10.1371/journal.pntd.0006421), 2018-04-19
Supplement: pntd.0006421.s003.pdf [file pntd.0006421.s003.pdf]

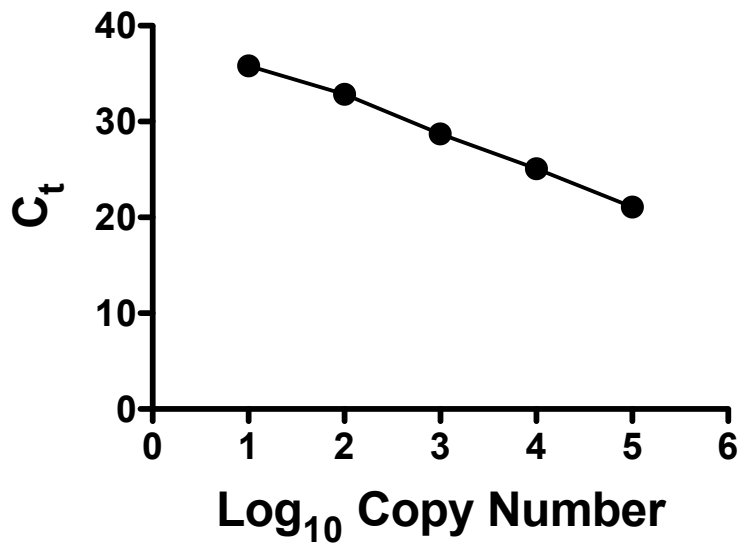

**S1 Figure. Standard curve for DENV NS5 qPCR.** Serial ten-fold dilutions of a plasmid containing the DENV NS5 cDNA (range 30-300,000 copies) were analyzed by qPCR as described in the Methods. Each dilution was performed in duplicate and mean value plus standard deviation of C<sub>t</sub> was plotted. The error bars may be too small to be seen. Thirty copies of plasmid was the smallest number for which we could detect a reliable C<sub>t</sub>, six plasmid copies yielded no C<sub>t</sub> value (not available or n/a).  $R^2 = 0.998$ . The negative control (no plasmid) yielded no C<sub>t</sub> values. This experiment was repeated two independent times.
